# Supplementary material
Source: PubMed Central journal article supplement (PMC6054494)

## SUPPLEMENTARY DATA

### APPENDIX 1 RISE Consortium Investigators

#### University of Chicago Clinical Research Center and Jesse Brown VA Medical Center (Chicago, IL)

David A. Ehrmann, MD\*  
Karla A. Temple, PhD, RD\*\*  
Abby Rue\*\*  
Elena Barengolts, MD  
Babak Mokhlesi, MD, MSc  
Eve Van Cauter, PhD  
Susan Sam, MD, MSc  
M. Annette Miller, RN

#### VA Puget Sound Health Care System and University of Washington (Seattle, WA)

Steven E. Kahn, MB, ChB\*  
Karen M. Atkinson, RN\*\*  
Jerry P. Palmer, MD  
Kristina M. Utzschneider, MD  
Tsige Gebremedhin, BS  
Abigail Kernan-Schloss, BA  
Alexandra Kozedub, MSN, ARNP  
Brenda K. Montgomery, RN, BSN, CDE  
Emily J. Morse, BS

#### Indiana University School of Medicine and Richard L. Roudebush VA Medical Center (Indianapolis, IN)

Kieren J. Mather, MD\*  
Tammy Garrett, RN\*\*  
Tamara S. Hannon, MD  
Amale Lteif, MD  
Aniket Patel MD  
Robin Chisholm, RN  
Karen Moore, RN  
Vivian Pirics, RN  
Linda Pratt, RN

#### University of Colorado Denver/Children's Hospital Colorado (Denver, CO)

Kristen J. Nadeau, MD, MS\*  
Susan Gross, RD\*\*  
Philip S. Zeitler, MD, PhD  
Jayne Williams, RN, MSN, CPNP  
Melanie Cree-Green, MD, PhD  
Yesenia Garcia Reyes, MS  
Krista Vissat, RN, MSN, CPNP

#### Children's Hospital of Pittsburgh of UPMC (Pittsburgh, PA)

Silva A. Arslanian, MD\*  
Kathleen Brown, RN, CDE\*\*  
Nancy Guerra, CRNP  
Kristin Porter, RN, CDE

#### Yale University (New Haven, CT)

Sonia Caprio, MD\*  
Mary Savoye, RD, CDE\*\*  
Bridget Pierpont, MS\*\*

#### University of Southern California Keck School of Medicine/Kaiser Permanente Southern California (Los Angeles, CA)

Thomas A. Buchanan, MD\*  
Anny H. Xiang, PhD\*  
Enrique Trigo, MD\*\*  
Elizabeth Beale, MD  
Fadi N. Hendee, MD  
Namir Katkhouda, MD  
Krishan Nayak, PhD  
Mayra Martinez, MPH  
Cortney Montgomery, BS  
Xinhui Wang, PhD

#### George Washington University Biostatistics Center (RISE Coordinating Center; Rockville, MD)

Sharon L. Edelstein, ScM\*  
John M. Lachin, ScD  
Ashley N. Hogan, MPH

#### Northwest Lipid Research Laboratories (Central Biochemistry Laboratory; Seattle, WA)

Santica Marcovina, PhD\*  
Jessica Harting\*\*  
John Albers, PhD

#### Belmar Pharmacy (Drug Distribution Center; Lakewood, CO)

Dave Hill

#### NIH/NIDDK (Bethesda, MD)

Peter J. Savage, MD  
Ellen W. Leschek, MD

\* denotes Principal Investigator  
\*\* denotes Program Coordinator

SUPPLEMENTARY DATA

**Supplementary Figure S1.** Relationship of insulin sensitivity ( $1/FI$ ) with the ratio of the incremental area under the curve (iAUC) for each  $\beta$ -cell peptide to that for glucose (CP-iAUC/G-iAUC and I-iAUC/G-iAUC) from the oral glucose tolerance test in youth and adults (A and B, respectively), and those with IGT and diabetes (C and D, respectively). Youth are shown in red, adults in blue, IGT in green and diabetes in purple. The slopes relating the  $\beta$ -cell response measures to insulin sensitivity were all significant ( $p < 0.001$ ), and the group differences were all significant (youth vs. adults:  $p = 0.02$  for CP-iAUC/G-iAUC and  $p < 0.001$  for I-iAUC/G-iAUC; IGT vs. diabetes:  $p < 0.001$  for CP-iAUC/G-iAUC and I-iAUC/G-iAUC). The slopes for youth and adults did not differ by group ( $p = 0.863$  for CP-iAUC/G-iAUC and  $p = 0.218$  for I-iAUC/G-iAUC). Similarly, the slopes for IGT and diabetes did not differ by group ( $p = 0.599$  for CP-iAUC/G-iAUC and  $p = 0.084$  for I-iAUC/G-iAUC).

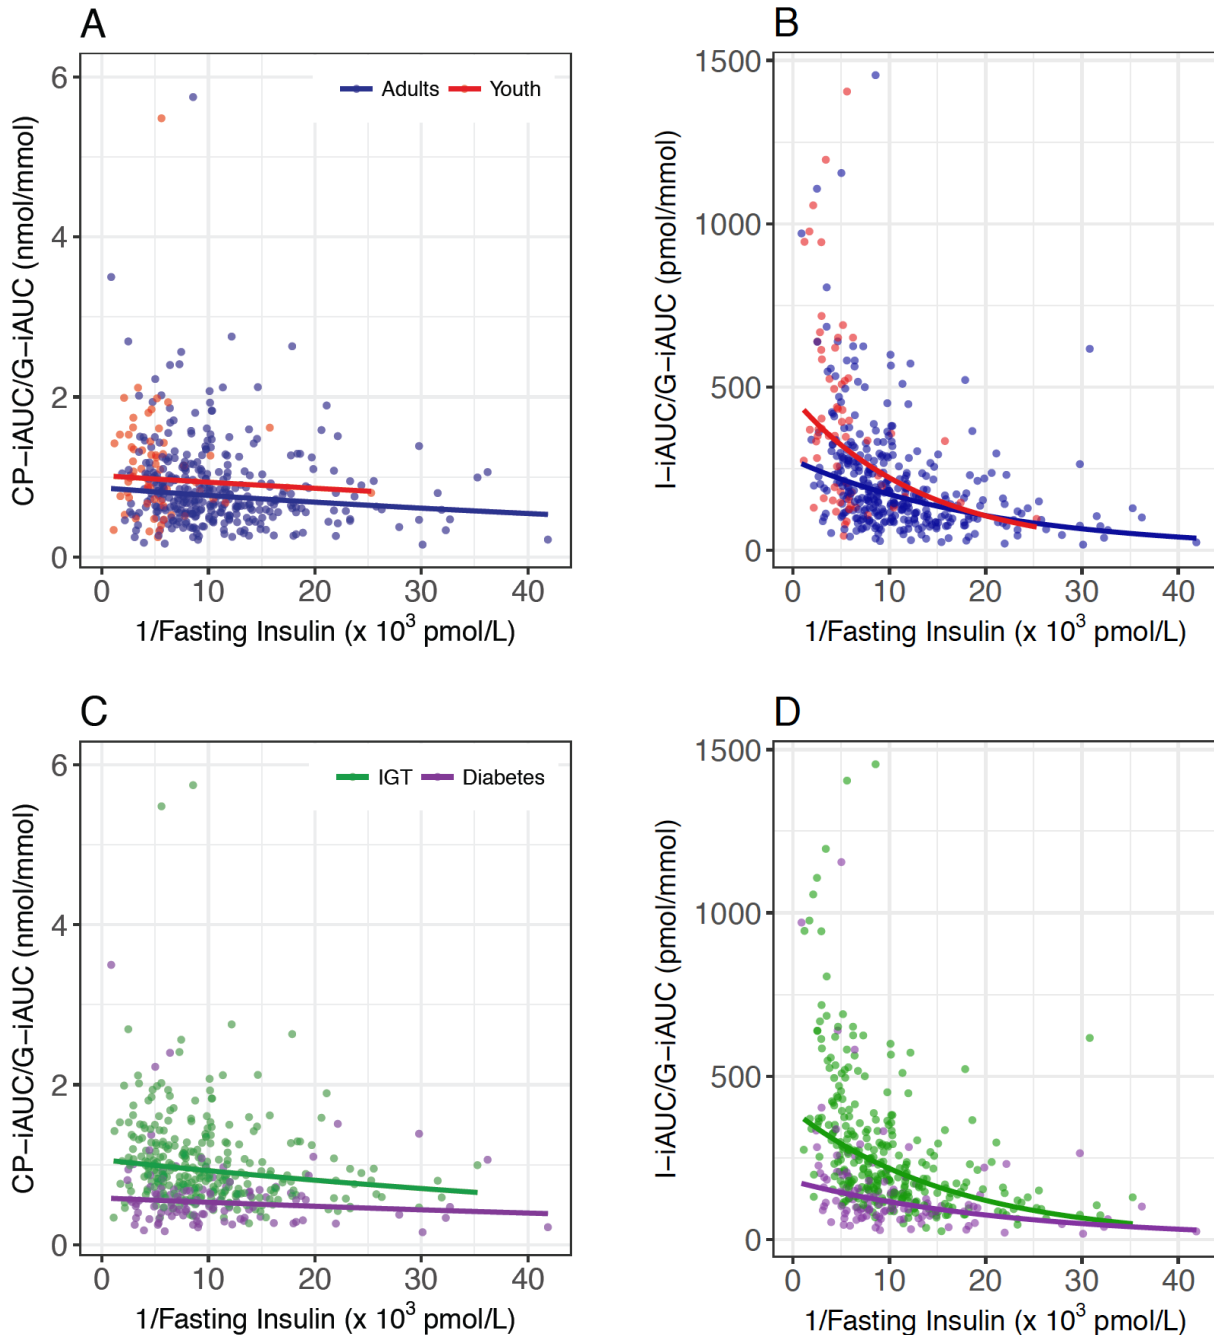

Supplement: DC180243SupplementaryData.pdf [file DC180243SupplementaryData.pdf]
